# Supplementary material
Source: PubMed Central journal article supplement (PMC2976831)
Supplement: NIHMS230554-supplement-Supp_data01.pdf [file NIHMS230554-supplement-Supp_data01.pdf]

Sup-Movies 1&2 . Transition from surface hexamer-of-hexamers to the transmembrane beta barrels. The segments are colored as in the text. The first morphing movie illustrates a side view of the backbone of four of the six hexamers. The second movie is a top view down the six-fold symmetric axis of the pore, showing all six hexamers. The morphing movies were created in two steps. Pdb files of intermediate stages were created from the five models of Fig. 3 using 'Morph' script in VMD software package. Next, these pdb files were converted to a movie file using VMD movie plugin version 1.7.
